# Supplementary material for: Trends in COVID-19 Vaccination Intent, Determinants and Reasons for Vaccine Hesitancy: Results from Repeated Cross-Sectional Surveys in the Adult General Population of Greece during November 2020–June 2021
Source: MDPI journal article supplement (doi:10.3390/vaccines10030470), 2022-03-18

**Supplementary Figure S1.** Adjusted predictions of reporting safety concerns by gender and age group (among respondents unwilling to get vaccinated)

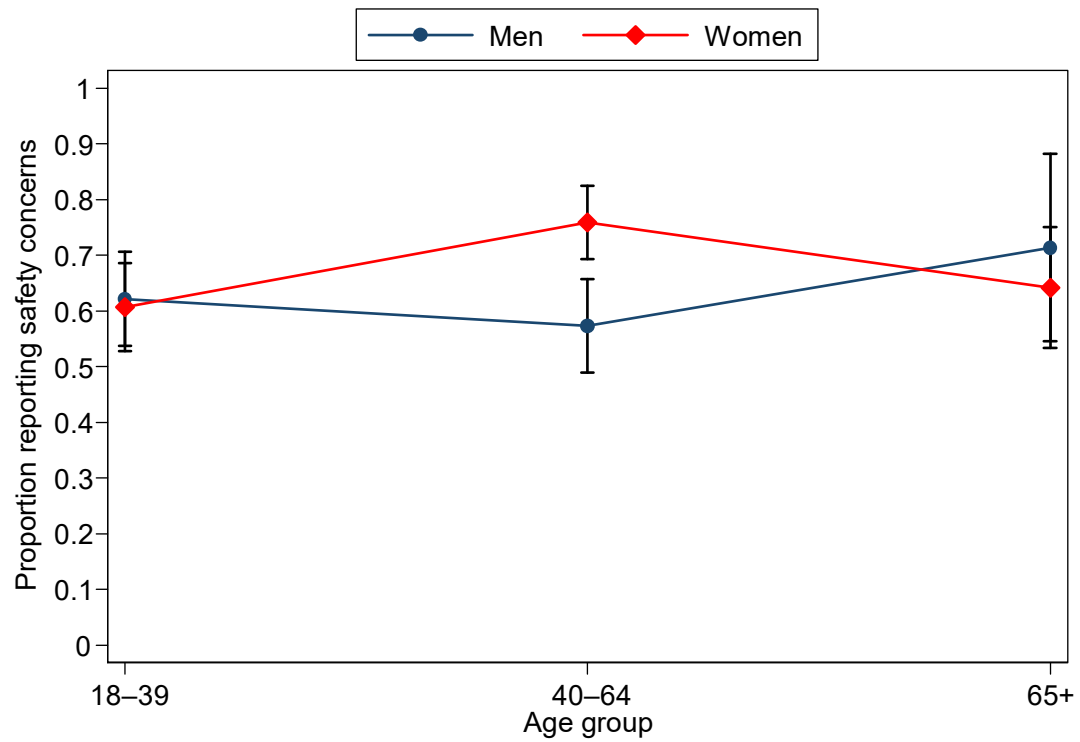

Supplement: s1 [file s1]
